# Supplementary material
Source: publisher figshare collection journal article supplement (https://gsapubs.figshare.com/ndownloader/files/31786475)
Supplement: Supplementary file 1 [file 31786475]

## Sheet: Table S-5 - Cnz Cover ages
Table S-5. Relative proportions of age fractions for the Cenozoic East Coast basin cover stratigraphy.
Age	Name	0–34	34–100	100–145	145–174	174–201	201–299	299–419	419–720	720–1000	1000–1600	1600–4500
		(Ma)	(Ma)	(Ma)	(Ma)	(Ma)	(Ma)	(Ma)	(Ma)	(Ma)	(Ma)	(Ma)
Modern	JG-WR49	0	0.00344828	0.0206897	0.0103448	0.0275862	0.462069	0.0827586	0.234483	0.0482759	0.0931034	0.0172414
Modern	JG-AW55	0	0.0238095	0.150794	0.0436508	0.0357143	0.384921	0.107143	0.146825	0.0515873	0.0436508	0.0119048
Modern	JG-CL40	0	0.0194175	0.194175	0.0194175	0.038835	0.296117	0.0970874	0.213592	0.0339806	0.0776699	0.00970874
Modern	JG-WU82	0	0	0.028436	0.0331754	0.0379147	0.440758	0.104265	0.203791	0.056872	0.0758294	0.0189573
Pliocene	NN-TB10	0.0186916	0	0.0373832	0.0280374	0.121495	0.504673	0.0747664	0.17757	0	0.0373832	0
Pliocene	NN-NG09	0.00490196	0	0.0245098	0.0588235	0.0882353	0.485294	0.0735294	0.127451	0.0490196	0.0735294	0.0147059
Pliocene	NN-NU24	0.111675	0	0.035533	0.0304569	0.142132	0.411168	0.0761421	0.0964467	0.0507614	0.035533	0.0101523
Pliocene	NN-TP37	0	0	0.111111	0.00854701	0.0512821	0.435897	0.0940171	0.179487	0.025641	0.0769231	0.017094
Pliocene	NN-HA42	0	0	0.0603448	0.00862069	0.0603448	0.491379	0.0948276	0.146552	0.0344828	0.0775862	0.0258621
Pliocene	NN-BF52	0	0	0.00961538	0.00961538	0.0384615	0.442308	0.120192	0.245192	0.0384615	0.0721154	0.0240385
Pliocene	NN-PA86	0	0	0.075	0.05	0.065	0.405	0.09	0.2	0.07	0.025	0.02
Pliocene	JG-AW4	0	0	0.224299	0.0280374	0.0280374	0.35514	0.102804	0.186916	0.0186916	0.0560748	0
Pliocene	JG-WR48	0	0	0.03125	0	0.0833333	0.572917	0.0729167	0.114583	0.0520833	0.0625	0.0104167
Pliocene	JG-WD23	0	0	0.227273	0.00909091	0.0363636	0.381818	0.0909091	0.118182	0.0272727	0.0909091	0.0181818
Pliocene	JG-CL39	0	0	0.0431034	0.0172414	0.0172414	0.482759	0.12931	0.189655	0.0344828	0.0775862	0.00862069
L.Miocene	NN-PA85	0	0.00332226	0.0996678	0.013289	0.00996678	0.388704	0.139535	0.202658	0.0797342	0.0465116	0.0166113
L.Miocene	NN-BF55	0	0	0.135	0.015	0.035	0.38	0.115	0.21	0.07	0.04	0
L.Miocene	NN-BF54	0	0	0.102804	0.00934579	0.0654206	0.46729	0.158879	0.11215	0.0186916	0.0560748	0.00934579
L.Miocene	NN-WE51	0.00961538	0	0.0865385	0.0192308	0.0673077	0.548077	0.115385	0.115385	0	0.0384615	0
L.Miocene	NN-HA43	0	0	0	0.0188679	0.0188679	0.509434	0.0754717	0.169811	0.0566038	0.150943	0
L.Miocene	NN-TH36	0	0	0.0169492	0.00847458	0.0847458	0.550847	0.0677966	0.135593	0.0762712	0.0508475	0.00847458
L.Miocene	NN-MP79	0.015	0	0.045	0.045	0.09	0.42	0.11	0.175	0.045	0.035	0.02
L.Miocene	NN-NU18	0.00917431	0	0.0458716	0.0183486	0.100917	0.504587	0.0733945	0.155963	0.0183486	0.0458716	0.0275229
L.Miocene	NN-NG05	0.046729	0.00934579	0.0841121	0.046729	0.0841121	0.429907	0.130841	0.121495	0.00934579	0.0373832	0
L.Miocene	NN-TB11	0.00943396	0	0.0377358	0.0754717	0.169811	0.45283	0.0849057	0.113208	0.0188679	0.0283019	0.00943396
L.Miocene	NN-TB13	0.01	0.01	0	0.04	0.13	0.5	0.06	0.16	0.03	0.02	0.04
L.Miocene	NN-TB14	0.0190476	0.00952381	0.0380952	0.0285714	0.104762	0.47619	0.133333	0.12381	0.00952381	0.0571429	0
L.Miocene	NN-TK12	0	0.00934579	0.168224	0.0747664	0.11215	0.35514	0.121495	0.0934579	0.0186916	0.046729	0
L.Miocene	NN-WB50	0	0.00689655	0	0	0.00689655	0.489655	0.0758621	0.213793	0.0551724	0.124138	0.0275862
L.Miocene	NN-WR46	0	0	0.178082	0.00684932	0.0342466	0.424658	0.143836	0.109589	0.0205479	0.0684932	0.0136986
L.Miocene	JG-AW27	0	0	0.0535714	0	0	0.339286	0.133929	0.330357	0.0625	0.0714286	0.00892857
L.Miocene	JG-AW32	0	0	0.136752	0	0	0.307692	0.119658	0.213675	0.025641	0.153846	0.042735
L.Miocene	JG-AW31	0	0	0.196262	0.046729	0.0186916	0.299065	0.130841	0.186916	0.0186916	0.0560748	0.046729
L.Miocene	JG-GB69	0	0	0.135266	0.0241546	0.0869565	0.444444	0.135266	0.0917874	0.0386473	0.0289855	0.0144928
M.Miocene	NN-NG07	0.04	0	0.03	0.08	0.1	0.5	0.09	0.09	0.04	0.03	0
M.Miocene	NN-NU19	0.045	0	0.17	0.075	0.115	0.36	0.065	0.13	0.02	0.015	0.005
M.Miocene	NN-NU15	0.06	0.01	0.18	0.1	0.11	0.31	0.05	0.12	0.03	0.02	0.01
M.Miocene	NN-NU39	0	0	0.138298	0.0531915	0.12766	0.393617	0.117021	0.106383	0.0212766	0.0319149	0.0106383
M.Miocene	NN-WE50	0	0	0.0194175	0.00970874	0.116505	0.592233	0.0679612	0.106796	0.0194175	0.0485437	0.0194175
M.Miocene	JG-LP5	0	0	0.123894	0.0353982	0.0530973	0.318584	0.141593	0.159292	0.0442478	0.106195	0.0176991
M.Miocene	JG-AW58	0	0	0.00869565	0	0	0.617391	0.0695652	0.182609	0.0521739	0.0695652	0
M.Miocene	JG-AW29	0	0	0.220339	0.0338983	0.0338983	0.338983	0.0932203	0.177966	0.0169492	0.059322	0.0254237
M.Miocene	JG-DM15	0	0	0.108108	0.00900901	0.018018	0.405405	0.144144	0.198198	0.0540541	0.0540541	0.00900901
M.Miocene	JG-GB70	0	0	0	0.0169492	0.0734463	0.531073	0.112994	0.186441	0.0225989	0.0338983	0.0225989
E.Miocene	NN-CP41	0	0	0.02	0.025	0.06	0.505	0.06	0.18	0.1	0.035	0.015
E.Miocene	NN-CP56	0	0	0.0373832	0.00934579	0.0186916	0.523364	0.130841	0.158879	0.0654206	0.046729	0.00934579
E.Miocene	NN-NG03	0.02	0	0.2	0.11	0.05	0.42	0.11	0.08	0	0.01	0
E.Miocene	NN-MP82	0	0	0.0430464	0.0463576	0.0827815	0.453642	0.149007	0.139073	0.0198675	0.0430464	0.0231788
E.Miocene	JG-DM11	0	0	0.0471698	0.00943396	0.0377358	0.490566	0.0943396	0.198113	0.0471698	0.0566038	0.0188679
E.Miocene	JG-CL21	0	0	0.00862069	0	0.00862069	0.456897	0.12931	0.25	0.0344828	0.0862069	0.0258621
E.Miocene	JG-CL22	0	0.00990099	0.019802	0.029703	0.188119	0.465347	0.0891089	0.0891089	0.039604	0.049505	0.019802
E.Miocene	JG-CB38	0	0	0.0854701	0.00854701	0.0854701	0.470085	0.196581	0.111111	0.017094	0.00854701	0.017094
E.Miocene	JG-LT68	0.00892857	0	0.0446429	0.00892857	0.125	0.535714	0.107143	0.107143	0.0178571	0.0446429	0
E.Miocene	JG-GB71	0	0	0.0402299	0.0287356	0.143678	0.425287	0.0977011	0.126437	0.0574713	0.0574713	0.0229885
Eoc–Oligo	NN-MP31	0	0	0.0808081	0.020202	0.020202	0.434343	0.151515	0.181818	0.030303	0.0707071	0.010101
Paleoc–Eoc	NN-MP33	0	0	0	0.0307692	0.0307692	0.553846	0.0923077	0.215385	0.0153846	0.0615385	0
Eoc–Oligo	BSH-15	0	0	0	0	0	0.730769	0	0.192308	0.0384615	0.0384615	0
Oligo-E.Mio	JG-CL90	0.017094	0	0.316239	0.00854701	0.042735	0.205128	0.0940171	0.102564	0.0769231	0.119658	0.017094
Oligo-E.Mio	JG-KA19	0.010929	0	0.185792	0.0218579	0.0765027	0.289617	0.185792	0.114754	0.0327869	0.0437158	0.0382514
Paleocene	JG-MB3	0	0	0.205128	0.042735	0.102564	0.290598	0.188034	0.0854701	0.00854701	0.0683761	0.00854701
Eocene	JG-GB75	0	0.00558659	0.0111732	0.0111732	0.0446927	0.52514	0.128492	0.173184	0.027933	0.0614525	0.0111732
Note: Color gradients of cells correspond to proportion of age fraction.
